# Supplementary material
Source: PubMed Central journal article supplement (PMC3743125)
Supplement: NIHMS487396-supplement-ESI.pdf [file NIHMS487396-supplement-ESI.pdf]

## Supplementary Data

Analytical Data for Compound **7**:  $^1\text{H}$  NMR (DMSO- $d_6$ ): 3.80 (s, 6H, 2x-OCH<sub>3</sub>), 7.00 (s, 2H, Ar-H), 7.42-7.45 (m, 2H), 7.93-7.95 (dd, 2H), 8.03-8.06 (d, 1H), 8.27 (s, 1H), 8.99 (s, 1H, OH);  $^{13}\text{C}$  NMR (DMSO- $d_6$ ): 56.96, 104.21, 110.03, 118.56, 123.35, 124.04, 125.23, 125.84, 127.16, 131.21, 134.05, 137.95, 138.38, 138.88, 140.67, 148.89.

Analytical Data for Compound **10**:  $^1\text{H}$  NMR (DMSO- $d_6$ ): 3.85 (s, 3H), 3.94 (s, 6H), 6.92 (s, 2H, Ar-H), 7.45-7.52 (m, 2H), 7.75 (s, 1H, =CH), 7.88-7.96 (m, 2H, Ar-H), 8.59 (s, 1H),  $^{13}\text{C}$  NMR (DMSO- $d_6$ ): 56.64, 60.55, 104.01, 111.80, 122.71, 123.47, 123.52, 125.21, 125.80, 129.35, 129.50, 130.07, 133.56, 138.38, 139.00, 139.37, 153.71.

Analytical Data for Compound **11**:  $^1\text{H}$  NMR (DMSO- $d_6$ ): 3.82 (s, 3H), 6.94 (s, 2H, Ar-H), 7.44-7.54 (m, 2H), 7.77 (s, 1H, =CH), 7.91-7.98 (m, 2H, Ar-H), 8.61 (s, 1H), 8.95 (s, 1H, OH);  $^{13}\text{C}$  NMR (DMSO- $d_6$ ): 55.96, 104.82, 111.85, 122.68, 123.35, 123.54, 125.46, 126.45, 129.48, 130.60, 131.03, 133.46, 138.56, 139.87, 139.52, 152.56.

Analytical Data for Compound **12**: 3.76 (s, 3H), 3.85 (s, 3H), 7.02-7.13 (m, 3H), 7.33-7.39 (sextet, 2H), 7.82-7.89 (m, 3H), 8.01 (s, 1H);  $^{13}\text{C}$  NMR (DMSO- $d_6$ ): 55.53, 55.62, 110.87, 112.16, 119.97, 121.84, 122.31, 123.43, 124.48, 124.86, 126.52, 132.27, 136.55, 137.28, 138.01, 140.85, 149.02, 150.00.

Analytical Data for Compound **16**: Analytical  $^1\text{H}$  NMR (DMSO- $d_6$ ): 3.72 (s, 3H), 3.89 (s, 6H), 7.10 (s, 2H, Ar-H), 7.48-7.52 (m, 2H), 8.08-8.10 (d, 1H), 8.23-8.25 (m, 2H, Ar-H), 8.60 (s, 1H),  $^{13}\text{C}$  NMR (DMSO- $d_6$ ): 55.70, 59.56, 103.81, 110.90, 122.52, 122.96, 123.34, 124.39, 125.53, 129.45, 129.40, 130.29, 132.49, 137.68, 138.50, 139.63, 152.23.

Compounds **9**, **14**, **15** and **17** have been reported elsewhere (Penthala, NR, Crooks PA, Sonar, VN, US patent application, 61/814,028, 2013).
